# Supplementary material
Source: PubMed Central journal article supplement (PMC5578875)
Supplement: NIHMS892925-supplement-2.pdf [file NIHMS892925-supplement-2.pdf]

**Supplementary Table 1. Comparison of protein identification and characterization results in pTop and MSPATHfinder for human ovarian tumor lysate sample.** Running times for deconvolution and database search, and the number of proteins, proteoforms, and protein-spectrum matches (PrSMs) identified by pTop and MSPATHfinder at 1% FDR. The search for internal cleaved proteoforms was disabled in MSPATHfinder because pTop v1.2 is able to search only non-cleaved proteoforms. Detailed parameter settings used in MSPATHfinder and pTop are in Supplementary Table 2 and 3, respectively.

|                                      |                 | pTop v1.2 | MSPATHfinder |
|--------------------------------------|-----------------|-----------|--------------|
| Run Time (minutes)                   | Deconvolution   | 19.4      | 52.9         |
|                                      | Database Search | 48.5      | 33.6         |
|                                      | Total           | 67.9      | 86.5         |
| #Proteoform-Spectrum Matches (PrSMs) |                 | 351       | 392          |
| #Proteins                            |                 | 37        | 45           |
| #Proteoforms                         |                 | 67        | 78           |

**Supplementary Table 2. Parameter settings for ProMex, MSDeconv+, and ICR-2LS.**

|                          | ProMex   | MSDeconv+           |      | ICR-2LS                |     |
|--------------------------|----------|---------------------|------|------------------------|-----|
| Min. charge              | 2        | 1                   |      | 2                      |     |
| Max. charge              | 60       | 30                  |      | 50                     |     |
| Min. mass                | 2000 Da  | N/A                 |      | 2000 Da                |     |
| Max. mass                | 50000 Da | 50000 Da            |      | 50000 Da               |     |
| Tool-specific parameters | N/A      | M/Z error tolerance | 0.02 | MaxFit                 | 0.2 |
|                          |          |                     |      | SignalToNoiseThreshold | 2   |
|                          |          | Signal/Noise Ratio  | 1    | PeakBackgroundRatio    | 2   |
|                          |          |                     |      | MinIntensityForScore   | 10  |

**Supplementary Table 3. Parameter settings for MSPATHfinder, MS-Align+ (TopPIC v0.9.1), ProSightPC v3.0, and pTop v1.2**

|                                 | MSPATHfinder                                                       |            | MS-Align+ (TopPIC v0.9.1) |                    | ProSightPC v3.0     | pTop v1.2                                           |                 |          |
|---------------------------------|--------------------------------------------------------------------|------------|---------------------------|--------------------|---------------------|-----------------------------------------------------|-----------------|----------|
| Search mode*                    | multiple internal cleavages                                        |            | N/A                       |                    | Biomarker discovery | N/A                                                 |                 |          |
| Precursor error                 | 10 ppm                                                             |            | 15 ppm                    |                    | 10 ppm              | ± 3.2 Da                                            |                 |          |
| Fragment error                  | 10 ppm                                                             |            | 15 ppm                    |                    | 10 ppm              | ± 10 ppm                                            |                 |          |
| Max. mass                       | 50000 Da                                                           |            | N/A                       |                    | N/A                 | 50000 Da                                            |                 |          |
| Min. mass                       | 2000 Da                                                            |            | N/A                       |                    | N/A                 | N/A                                                 |                 |          |
| Variable modifications          | Oxidation at Met<br>Dehydro at Cys<br>Acetyl at Protein N-terminal |            | N/A                       |                    | N/A                 | Oxidation[M]<br>Dehydro[C]<br>Acetyl[ProteinN-term] |                 |          |
| Max. modifications per sequence | 4                                                                  |            | N/A                       |                    | N/A                 | 4                                                   |                 |          |
| Tool-specific parameters        | Min. sequence length                                               | 21         | Cysteine protecting group | no modification    | N/A                 | Precursor Detection                                 | Isolation Width | 10       |
|                                 | Max. sequence length                                               | 300        |                           |                    |                     |                                                     | Mixture Spectra | checked  |
|                                 | Min. precursor ion charge                                          | 2          | Max. unexpected PTM mass  | 10 <sup>6</sup> Da |                     | Deconvolution                                       | Max. charge     | 30       |
|                                 | Max. precursor ion charge                                          | 60         |                           |                    |                     |                                                     | Max. mass       | 50000 Da |
|                                 | Min. product ion charge                                            | 1          | Max. unexpected PTMs      | 2                  |                     | M/Z tolerance                                       | 20 ppm          |          |
|                                 | Max. product ion charge                                            | 20         | Cutoff type               | EVALUE             |                     | S/N Ratio                                           | 1.5             |          |
|                                 | tagSearch*                                                         | 1 (enable) | Cutoff value              | 0.01               |                     |                                                     |                 |          |

\*In the comparison with pTop, SearchMode and tagSearch in MSPATHfinder were set to no-cleavage and 0 (disable), respectively
